# Supplementary material for: Edge-rich and (N, S)-doped 3D porous graphene as an efficient metal-free electrocatalyst for the oxygen reduction reaction
Source: Royal Society of Chemistry journal article supplement (doi:10.1039/c6ra13651f), 2016-01-01
Supplement: c6ra13651f1.pdf [file c6ra13651f1.pdf]

supporting information for " *Edge-rich and (N, S)-doped 3D porous graphene as efficient metal-free electrocatalyst for ORR* "

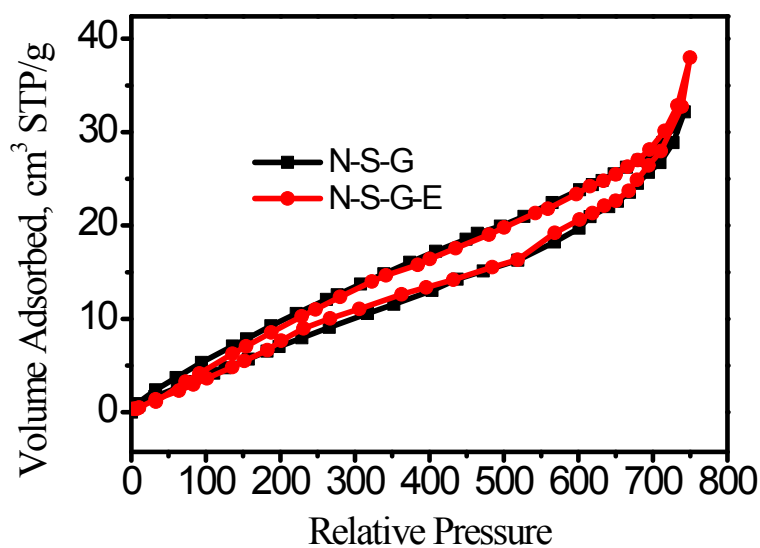

Fig. 1 Nitrogen adsorption curves for N-S-G and N-S-G-E

Table 1 the N1s species and content in N-S-G and N-S-G-E

| Materials | total N<br>(at.%) | N1s species               |                           |                            |                           |
|-----------|-------------------|---------------------------|---------------------------|----------------------------|---------------------------|
|           |                   | pyrdinic N<br>(398.54 eV) | pyrrolic N<br>(399.67 eV) | graphitic N<br>(400.73 eV) | oxidized N<br>(403.07 eV) |
| N-S-G     | 2.21%             | 5.58%                     | 63.12%                    | 23.51%                     | 7.67%                     |
| N-S-G-E   | 4.50%             | 36.54%                    | 15.26%                    | 40.81%                     | 7.39%                     |
